# Supplementary material for: A Thermophilic Phage Endolysin Fusion to a Clostridium perfringens-Specific Cell Wall Binding Domain Creates an Anti-Clostridium Antimicrobial with Improved Thermostability
Source: PubMed Central journal article supplement (PMC4488725; doi:10.3390/v7062758), 2015-06-12
Supplement: viruses-07-02758-s001.pdf [file viruses-07-02758-s001.pdf]

**Supplementary Data for “A thermophilic phage endolysin fusion to a *Clostridium perfringens*-specific cell wall binding domain creates an anti-clostridium antimicrobial with improved thermostability”**

Recombinant protein 20130729: GAV-CpCWB Mass Spectrometry and BLAST Results

**Original Sequence:**

MGMKKIFWDKGGSDPGAVANGLQEKNLTHKIVEYATDYLAAHYEGFTQQRVSREGDQSLTLDQRADMANKWGADVFVSVHINAGK  
GTGFEIYVHPNASPQSIALQNVLHGEILSAMRQFGNITDRGKKRANYAVLRETKMPAVLTENLFIDSNDAKHLKNEAFLKAVGEAHARGVA  
KFLGRYLANAIDPNIPEKEQDYRVCVQRFTNKEDA EKAQQRISNELGYCFAEKI

putative N-acetylmuramoyl-L-alanine amidase [*Geobacillus* virus E2]

Sequence ID: [ref|YP\\_001285830.1](#) Length: 233; Number of Matches: 1

[Gene-associated gene details](#)

Range 1: 1 to 230 [GenPeptGraphics](#)

Alignment statistics for match #1

| Score         | Expect                                                          | Method                       | Identities   | Positives    | Gaps      |
|---------------|-----------------------------------------------------------------|------------------------------|--------------|--------------|-----------|
| 386 bits(991) | 4e-133                                                          | Compositional matrix adjust. | 193/231(84%) | 202/231(87%) | 4/231(1%) |
| Query 3       | MKKIFWDKGGSDPGAVANGLQEKNLTHKIVEYATDYLAAHYEGFTQQRVSREGDQSLTTL    |                              |              |              | 62        |
| Sbjct 1       | MKKIFWDKGGSDPGAVANGLQEKNLTHKIVEYATDYLAAHYEGFTQQRVSREGDQSLTTL    |                              |              |              | 60        |
| Query 63      | DQRADMANKWGADVFVSVHINAGKGTGFEIYVHPNASPQSIALQNVLHGEILSAMRQFGN    |                              |              |              | 122       |
| Sbjct 61      | DQRADMANKWGADVFVSVHINAGKGTGFEIYVHPNASPQSIALQNVLHGEILSAMRQFGN    |                              |              |              | 120       |
| Query 123     | ITDRGKKRANYAVLRETKMPAVLTENLFIDSNDAKHLKNEAFLKAVGEAHARGVAKFLGR    |                              |              |              | 182       |
| Sbjct 121     | ITDRGKKRANYAVLRETKMPAVLTENLFIDSNDAKHLKNEAFLKAVGEAHARGVAKFLGL    |                              |              |              | 180       |
| Query 183     | YLANAIDPNI- <u>PLEKEQD</u> --YRVCVQRFTNKEDA EKAQQRISNELGYCFAEKI |                              |              |              | 232       |
| Sbjct 181     | KEKQKAQPEAKPQKPSDKKLYRVQVGFADRENAERLAEELKRK-GYPVY---ITD         |                              |              |              | 233       |

**Mass Spec Sequences:**

mgmkkifwdkghggsdpGAVANGLQEKNLTHKIVEYATDYLAAHYEGFTQQRvsrEGDQSLTLDQRadmankwgadvfsvhinagkGTGFEIYVHPNASPQSIALQNVLHGEILSAMRqfgnitdrGKKRANYAVLRETKMPAVLTENLFIDSNDAKHLkNEAFLKAVGEAHARGvakflgrYLANAIDPNIPEKEQDYRvcvqrftnkedaekaqrISNELGYCFAEKilehhhhh

Underlined sequence is *Geobacillus* phage E2 Amidase, while remaining C-terminal sequences are the cell wall binding domain for *Clostridium perfringens*; Sequences in CAPS indicate peptides identified by mass spec.

DATABASE SEARCHING-- Tandem mass spectra were extracted by Sorcerer v3.5 (Sage-N Research, Milpitas CA). Charge state deconvolution and deisotoping were not performed. All MS/MS samples were analyzed using Sequest (Thermo Fisher Scientific, San Jose, CA, USA; version 1.0). Sequest was set up to search the *Clostridium\_Seal\_decoys\_20130729* database assuming the digestion enzyme strict-trypsin. Sequest was searched with a fragment ion mass tolerance of 1.00 Da and a parent ion tolerance of 10.0 PPM. Carbamidomethyl of cysteine was specified in Sequest as a fixed modification. Oxidation of methionine was specified in Sequest as a variable modification.

CRITERIA FOR PROTEIN IDENTIFICATION-- Scaffold (version Scaffold\_4.0.7, Proteome Software Inc., Portland, OR) was used to validate MS/MS based peptide and protein identifications. Peptide identifications were accepted if they could be established at greater than 95.0% probability by the Scaffold Local FDR algorithm. Protein identifications were accepted if they could be established at greater than 95.0% probability and contained at least 5 identified peptides. Protein probabilities were assigned by the Protein Prophet algorithm (Nesvizhskii, Al et al Anal. Chem. 2003;75(17):4646-58). Proteins that contained similar peptides and could not be

differentiated based on MS/MS analysis alone were grouped to satisfy the principles of parsimony. Proteins sharing significant peptide evidence were grouped into clusters. Proteins were annotated with GO terms from NCBI (downloaded Jul 30, 2013). (Ashburner, M et al Nat. Genet. 2000;25(1):25-9).

| 3369-Seal_20percent_Condensed |                                  | Displaying: Protein Identification Probability |                              |           |                                             |
|-------------------------------|----------------------------------|------------------------------------------------|------------------------------|-----------|---------------------------------------------|
| Identified Proteins (1)       | Accession Number                 | Molecular Weight                               | Protein Grouping             | Ambiguity | Quantitative Variance Taxonomy Bio-Sample 1 |
| 1                             | true                             | Empty                                          | recombinant_protein_20130729 | GAV-CpCWB | 27 kDa 100%                                 |
| Index                         | Peptide                          | Prob                                           | Exclusive To                 | Valid     | GAV-CpCWB                                   |
| 01                            | ANYAVLR                          | 67%                                            | recombinant_protein_20130729 | true      | 1.00                                        |
| 02                            | ANYAVLRETK                       | 13%                                            | recombinant_protein_20130729 | true      | 1.00                                        |
| 03                            | AVGEAHAR                         | 99%                                            | recombinant_protein_20130729 | true      | 1.00                                        |
| 04                            | EGDQSLTLDQR                      | 100%                                           | recombinant_protein_20130729 | true      | 1.00                                        |
| 05                            | EQDYIR                           | 48%                                            | recombinant_protein_20130729 | true      | 1.00                                        |
| 06                            | FLGRYLANAIDPNIPLEK               | 14%                                            | recombinant_protein_20130729 | true      | 1.00                                        |
| 07                            | FTNKEDAEEK                       | 14%                                            | recombinant_protein_20130729 | true      | 1.00                                        |
| 08                            | GHGGSDPGAVANGLQEK                | 100%                                           | recombinant_protein_20130729 | true      | 1.00                                        |
| 09                            | GHGGSDPGAVANGLQEKNLTHK           | 72%                                            | recombinant_protein_20130729 | true      | 1.00                                        |
| 10                            | GTGFEIYVHPNASPQSIALQNVLHGEILSAMR | 100%                                           | recombinant_protein_20130729 | true      | 1.00                                        |
| 11                            | GVAKFLGR                         | 11%                                            | recombinant_protein_20130729 | true      | 1.00                                        |
| 12                            | HLKNEAFLK                        | 76%                                            | recombinant_protein_20130729 | true      | 1.00                                        |
| 13                            | IFWDK                            | 10%                                            |                              | true      |                                             |
| 14                            | IFWDKGHGGSDPGAVANGLQEK           | 100%                                           | recombinant_protein_20130729 | true      | 1.00                                        |
| 15                            | ISNELGYCFAEK                     | 100%                                           | recombinant_protein_20130729 | true      | 1.00                                        |
| 16                            | IVEYATDYLAAHYEGFTQR              | 100%                                           | recombinant_protein_20130729 | true      | 1.00                                        |
| 17                            | IVEYATDYLAAHYEGFTQRVSR           | 13%                                            | recombinant_protein_20130729 | true      | 1.00                                        |
| 18                            | KIFWDK                           | 13%                                            | recombinant_protein_20130729 | true      | 1.00                                        |
| 19                            | MPAVLTENLFIDSNDK                 | 100%                                           | recombinant_protein_20130729 | true      | 1.00                                        |
| 20                            | NEAFLKAVGEAHAR                   | 100%                                           | recombinant_protein_20130729 | true      | 1.00                                        |
| 21                            | NLTHKIVEYATDYLAAHYEGFTQR         | 100%                                           | recombinant_protein_20130729 | true      | 1.00                                        |
| 22                            | NYAVLR                           | 31%                                            | recombinant_protein_20130729 | true      | 1.00                                        |
| 23                            | QFGNITDR                         | 13%                                            | recombinant_protein_20130729 | true      | 1.00                                        |
| 24                            | RANYAVLR                         | 82%                                            | recombinant_protein_20130729 | true      | 1.00                                        |
| 25                            | WGADVFSVHINAGK                   | 52%                                            | recombinant_protein_20130729 | true      | 1.00                                        |
| 26                            | YLANAIDPNIPLEK                   | 100%                                           | recombinant_protein_20130729 | true      | 1.00                                        |
| 27                            | YLANAIDPNIPLEKEQDYIR             | 100%                                           | recombinant_protein_20130729 | true      | 1.00                                        |
| 28                            | YLANAIDPNIPLEKEQDYIRVVCVQR       | 12%                                            | recombinant_protein_20130729 | true      | 1.00                                        |

| Experiment name                                 | Biological sample category<br>Number of unique peptides<br>Modifications identified by spectrum | Biological sample name<br>Number of unique peptides<br>Actual peptide mass (AMU) | MS/MS sample name<br>Bio Sample 1 | Protein group<br>Number of total spectra<br>Spectrum charge | Protein accession number<br>Spectrum name<br>Actual minus calculated peptide mass (AMU) | Protein name<br>Peptide sequence | Protein identification probability<br>Previous amino acid<br>Next amino acid<br>Actual minus calculated peptide mass (PPM) | Protein percentage of total spectra<br>Peptide identification probability<br>Peptide start index | Protein molecular weight (AMU)<br>SEQUEST XCorr score<br>SEQUEST DcN score<br>Peptide stop index |
|-------------------------------------------------|-------------------------------------------------------------------------------------------------|----------------------------------------------------------------------------------|-----------------------------------|-------------------------------------------------------------|-----------------------------------------------------------------------------------------|----------------------------------|----------------------------------------------------------------------------------------------------------------------------|--------------------------------------------------------------------------------------------------|--------------------------------------------------------------------------------------------------|
| 3369-Seal_20percent_Condensed<br>29<br>-2.1     | Uncategorized Sample<br>97<br>165                                                               | Seal_20percent.221.221.2<br>172                                                  | Bio Sample 1                      | Seal_20percent<br>AVGEAAR<br>K                              | recombinant_protein_20130729<br>G                                                       | GAV-CpCWB<br>99.0%               | recombinant_protein_20130729<br>1.95<br>0.359                                                                              | 100.0%<br>809.41                                                                                 | 1.61%<br>2<br>26,812.4<br>12<br>-0.0017                                                          |
| 3369-Seal_20percent_Condensed<br>29<br>-2.2     | Uncategorized Sample<br>97<br>53                                                                | Seal_20percent.2895.2895.2<br>63                                                 | Bio Sample 1                      | Seal_20percent<br>EGDQSLTDQR<br>R                           | recombinant_protein_20130729<br>A                                                       | GAV-CpCWB<br>99.7%               | recombinant_protein_20130729<br>2.68<br>0.325                                                                              | 100.0%<br>1,260.59                                                                               | 1.61%<br>2<br>26,812.4<br>12<br>-0.0027                                                          |
| 3369-Seal_20percent_Condensed<br>29<br>-2.5     | Uncategorized Sample<br>97<br>53                                                                | Seal_20percent.2549.2549.2<br>63                                                 | Bio Sample 1                      | Seal_20percent<br>EGDQSLTDQR<br>R                           | recombinant_protein_20130729<br>A                                                       | GAV-CpCWB<br>99.7%               | recombinant_protein_20130729<br>2.88<br>0.326                                                                              | 100.0%<br>1,260.59                                                                               | 1.61%<br>2<br>26,812.4<br>12<br>-0.0031                                                          |
| 3369-Seal_20percent_Condensed<br>29<br>-0.0038  | Uncategorized Sample<br>97<br>-2.4                                                              | Seal_20percent.2277.2277.3<br>9<br>25                                            | Bio Sample 1                      | Seal_20percent<br>GHGSDPGAVANGLQEK<br>K                     | recombinant_protein_20130729<br>K                                                       | GAV-CpCWB<br>99.7%               | recombinant_protein_20130729<br>3.21                                                                                       | 100.0%<br>0.298                                                                                  | 1.61%<br>3<br>26,812.4<br>12<br>1,592.75                                                         |
| 3369-Seal_20percent_Condensed<br>29<br>-0.0020  | Uncategorized Sample<br>97<br>-1.3                                                              | Seal_20percent.2272.2272.2<br>9<br>25                                            | Bio Sample 1                      | Seal_20percent<br>GHGSDPGAVANGLQEK<br>K                     | recombinant_protein_20130729<br>K                                                       | GAV-CpCWB<br>99.7%               | recombinant_protein_20130729<br>3.08                                                                                       | 100.0%<br>0.601                                                                                  | 1.61%<br>2<br>26,812.4<br>12<br>1,592.75                                                         |
| 3369-Seal_20percent_Condensed<br>29<br>-0.013   | Uncategorized Sample<br>97<br>-3.8                                                              | Seal_20percent.9218.9218.4<br>85<br>116                                          | Bio Sample 1                      | Seal_20percent<br>GTGFEIYVHPNASPQSIQLQNVLHGELISAMR<br>K     | recombinant_protein_20130729<br>K                                                       | GAV-CpCWB<br>99.7%               | recombinant_protein_20130729<br>2.50                                                                                       | 100.0%<br>0.317                                                                                  | 1.61%<br>Oxidation (+16)<br>4<br>26,812.4<br>12<br>3,464.74                                      |
| 3369-Seal_20percent_Condensed<br>29<br>-0.0093  | Uncategorized Sample<br>97<br>-2.7                                                              | Seal_20percent.8558.8558.3<br>85<br>116                                          | Bio Sample 1                      | Seal_20percent<br>GTGFEIYVHPNASPQSIQLQNVLHGELISAMR<br>K     | recombinant_protein_20130729<br>K                                                       | GAV-CpCWB<br>99.7%               | recombinant_protein_20130729<br>2.38                                                                                       | 100.0%<br>0.339                                                                                  | 1.61%<br>Oxidation (+16)<br>3<br>26,812.4<br>12<br>3,464.74                                      |
| 3369-Seal_20percent_Condensed<br>29<br>0.00024  | Uncategorized Sample<br>97<br>0.068                                                             | Seal_20percent.8598.8598.5<br>85<br>116                                          | Bio Sample 1                      | Seal_20percent<br>GTGFEIYVHPNASPQSIQLQNVLHGELISAMR<br>K     | recombinant_protein_20130729<br>K                                                       | GAV-CpCWB<br>99.7%               | recombinant_protein_20130729<br>3.18                                                                                       | 100.0%<br>0.293                                                                                  | 1.61%<br>Oxidation (+16)<br>5<br>26,812.4<br>12<br>3,464.75                                      |
| 3369-Seal_20percent_Condensed<br>29<br>0.98     | Uncategorized Sample<br>97<br>280                                                               | Seal_20percent.8845.8845.4<br>85<br>116                                          | Bio Sample 1                      | Seal_20percent<br>GTGFEIYVHPNASPQSIQLQNVLHGELISAMR<br>K     | recombinant_protein_20130729<br>K                                                       | GAV-CpCWB<br>99.7%               | recombinant_protein_20130729<br>3.37                                                                                       | 100.0%<br>0.308                                                                                  | 1.61%<br>Oxidation (+16)<br>4<br>26,812.4<br>12<br>3,465.73                                      |
| 3369-Seal_20percent_Condensed<br>29<br>-0.0079  | Uncategorized Sample<br>97<br>-2.3                                                              | Seal_20percent.8936.8936.4<br>85<br>116                                          | Bio Sample 1                      | Seal_20percent<br>GTGFEIYVHPNASPQSIQLQNVLHGELISAMR<br>K     | recombinant_protein_20130729<br>K                                                       | GAV-CpCWB<br>99.7%               | recombinant_protein_20130729<br>2.55                                                                                       | 100.0%<br>0.340                                                                                  | 1.61%<br>Oxidation (+16)<br>4<br>26,812.4<br>12<br>3,464.74                                      |
| 3369-Seal_20percent_Condensed<br>29<br>-0.0081  | Uncategorized Sample<br>97<br>-2.4                                                              | Seal_20percent.9587.9587.4<br>85<br>116                                          | Bio Sample 1                      | Seal_20percent<br>GTGFEIYVHPNASPQSIQLQNVLHGELISAMR<br>K     | recombinant_protein_20130729<br>K                                                       | GAV-CpCWB<br>99.7%               | recombinant_protein_20130729<br>2.76                                                                                       | 100.0%<br>0.353                                                                                  | 1.61%<br>4<br>26,812.4<br>12<br>3,448.75                                                         |
| 3369-Seal_20percent_Condensed<br>29<br>-0.016   | Uncategorized Sample<br>97<br>-4.7                                                              | Seal_20percent.9074.9074.4<br>85<br>116                                          | Bio Sample 1                      | Seal_20percent<br>GTGFEIYVHPNASPQSIQLQNVLHGELISAMR<br>K     | recombinant_protein_20130729<br>K                                                       | GAV-CpCWB<br>99.7%               | recombinant_protein_20130729<br>2.85                                                                                       | 100.0%<br>0.373                                                                                  | 1.61%<br>Oxidation (+16)<br>4<br>26,812.4<br>12<br>3,464.74                                      |
| 3369-Seal_20percent_Condensed<br>29<br>-0.0030  | Uncategorized Sample<br>97<br>-0.87                                                             | Seal_20percent.9430.9430.4<br>85<br>116                                          | Bio Sample 1                      | Seal_20percent<br>GTGFEIYVHPNASPQSIQLQNVLHGELISAMR<br>K     | recombinant_protein_20130729<br>K                                                       | GAV-CpCWB<br>99.7%               | recombinant_protein_20130729<br>3.64                                                                                       | 100.0%<br>0.371                                                                                  | 1.61%<br>4<br>26,812.4<br>12<br>3,448.75                                                         |
| 3369-Seal_20percent_Condensed<br>29<br>0.98     | Uncategorized Sample<br>97<br>280                                                               | Seal_20percent.8987.8987.4<br>85<br>116                                          | Bio Sample 1                      | Seal_20percent<br>GTGFEIYVHPNASPQSIQLQNVLHGELISAMR<br>K     | recombinant_protein_20130729<br>K                                                       | GAV-CpCWB<br>99.7%               | recombinant_protein_20130729<br>3.37                                                                                       | 100.0%<br>0.457                                                                                  | 1.61%<br>Oxidation (+16)<br>4<br>26,812.4<br>12<br>3,465.73                                      |
| 3369-Seal_20percent_Condensed<br>29<br>0.98     | Uncategorized Sample<br>97<br>280                                                               | Seal_20percent.9650.9650.4<br>85<br>116                                          | Bio Sample 1                      | Seal_20percent<br>GTGFEIYVHPNASPQSIQLQNVLHGELISAMR<br>K     | recombinant_protein_20130729<br>K                                                       | GAV-CpCWB<br>99.7%               | recombinant_protein_20130729<br>3.99                                                                                       | 100.0%<br>0.456                                                                                  | 1.61%<br>4<br>26,812.4<br>12<br>3,449.74                                                         |
| 3369-Seal_20percent_Condensed<br>29<br>0.98     | Uncategorized Sample<br>97<br>280                                                               | Seal_20percent.9641.9641.3<br>85<br>116                                          | Bio Sample 1                      | Seal_20percent<br>GTGFEIYVHPNASPQSIQLQNVLHGELISAMR<br>K     | recombinant_protein_20130729<br>K                                                       | GAV-CpCWB<br>99.7%               | recombinant_protein_20130729<br>3.78                                                                                       | 100.0%<br>0.467                                                                                  | 1.61%<br>3<br>26,812.4<br>12<br>3,449.73                                                         |
| 3369-Seal_20percent_Condensed<br>29<br>0.98     | Uncategorized Sample<br>97<br>280                                                               | Seal_20percent.8847.8847.3<br>85<br>116                                          | Bio Sample 1                      | Seal_20percent<br>GTGFEIYVHPNASPQSIQLQNVLHGELISAMR<br>K     | recombinant_protein_20130729<br>K                                                       | GAV-CpCWB<br>99.7%               | recombinant_protein_20130729<br>3.10                                                                                       | 100.0%<br>0.507                                                                                  | 1.61%<br>Oxidation (+16)<br>3<br>26,812.4<br>12<br>3,465.74                                      |
| 3369-Seal_20percent_Condensed<br>29<br>-0.020   | Uncategorized Sample<br>97<br>-5.8                                                              | Seal_20percent.9364.9364.5<br>85<br>116                                          | Bio Sample 1                      | Seal_20percent<br>GTGFEIYVHPNASPQSIQLQNVLHGELISAMR<br>K     | recombinant_protein_20130729<br>K                                                       | GAV-CpCWB<br>99.7%               | recombinant_protein_20130729<br>3.73                                                                                       | 100.0%<br>0.449                                                                                  | 1.61%<br>5<br>26,812.4<br>12<br>3,448.74                                                         |
| 3369-Seal_20percent_Condensed<br>29<br>0.0038   | Uncategorized Sample<br>97<br>1.1                                                               | Seal_20percent.9316.9316.3<br>85<br>116                                          | Bio Sample 1                      | Seal_20percent<br>GTGFEIYVHPNASPQSIQLQNVLHGELISAMR<br>K     | recombinant_protein_20130729<br>K                                                       | GAV-CpCWB<br>99.7%               | recombinant_protein_20130729<br>3.76                                                                                       | 100.0%<br>0.449                                                                                  | 1.61%<br>3<br>26,812.4<br>12<br>3,448.76                                                         |
| 3369-Seal_20percent_Condensed<br>29<br>-0.00098 | Uncategorized Sample<br>97<br>-0.28                                                             | Seal_20percent.9453.9453.3<br>85<br>116                                          | Bio Sample 1                      | Seal_20percent<br>GTGFEIYVHPNASPQSIQLQNVLHGELISAMR<br>K     | recombinant_protein_20130729<br>K                                                       | GAV-CpCWB<br>99.7%               | recombinant_protein_20130729<br>4.41                                                                                       | 100.0%<br>0.493                                                                                  | 1.61%<br>3<br>26,812.4<br>12<br>3,448.76                                                         |
| 3369-Seal_20percent_Condensed<br>29<br>-0.0065  | Uncategorized Sample<br>97<br>-1.9                                                              | Seal_20percent.8656.8656.4<br>85<br>116                                          | Bio Sample 1                      | Seal_20percent<br>GTGFEIYVHPNASPQSIQLQNVLHGELISAMR<br>K     | recombinant_protein_20130729<br>K                                                       | GAV-CpCWB<br>99.7%               | recombinant_protein_20130729<br>4.93                                                                                       | 100.0%<br>0.559                                                                                  | 1.61%<br>Oxidation (+16)<br>4<br>26,812.4<br>12<br>3,464.74                                      |
| 3369-Seal_20percent_Condensed<br>29<br>-0.0073  | Uncategorized Sample<br>97<br>-3.2                                                              | Seal_20percent.4527.4527.4<br>4<br>25                                            | Bio Sample 1                      | Seal_20percent<br>IFWDKGGSDPGAVANGLQEK<br>K                 | recombinant_protein_20130729<br>K                                                       | GAV-CpCWB<br>99.7%               | recombinant_protein_20130729<br>3.01                                                                                       | 100.0%<br>0.275                                                                                  | 1.61%<br>4<br>26,812.4<br>12<br>2,282.10                                                         |
| 3369-Seal_20percent_Condensed<br>29<br>-0.0038  | Uncategorized Sample<br>97<br>-1.7                                                              | Seal_20percent.4530.4530.3<br>4<br>25                                            | Bio Sample 1                      | Seal_20percent<br>IFWDKGGSDPGAVANGLQEK<br>K                 | recombinant_protein_20130729<br>K                                                       | GAV-CpCWB<br>99.7%               | recombinant_protein_20130729<br>3.35                                                                                       | 100.0%<br>0.314                                                                                  | 1.61%<br>3<br>26,812.4<br>12<br>2,282.10                                                         |
| 3369-Seal_20percent_Condensed<br>29<br>0.0018   | Uncategorized Sample<br>97<br>0.80                                                              | Seal_20percent.4564.4564.2<br>4<br>25                                            | Bio Sample 1                      | Seal_20percent<br>IFWDKGGSDPGAVANGLQEK<br>K                 | recombinant_protein_20130729<br>K                                                       | GAV-CpCWB<br>99.7%               | recombinant_protein_20130729<br>2.49                                                                                       | 100.0%<br>0.494                                                                                  | 1.61%<br>2<br>26,812.4<br>12<br>2,282.11                                                         |
| 3369-Seal_20percent_Condensed<br>29<br>0.0017   | Uncategorized Sample<br>97<br>1.1                                                               | Seal_20percent.6429.6429.2<br>219<br>231                                         | Bio Sample 1                      | Seal_20percent<br>ISNELGYYFAEK<br>R                         | recombinant_protein_20130729<br>I                                                       | GAV-CpCWB<br>99.7%               | recombinant_protein_20130729<br>2.36<br>0.396                                                                              | 100.0%<br>Carbamidomethyl (+57)                                                                  | 1.61%<br>2<br>26,812.4<br>12<br>1,592.72                                                         |

|                                                 |                                     |                                                   |                                      |                                        |                         |                                               |                                 |       |                      |         |
|-------------------------------------------------|-------------------------------------|---------------------------------------------------|--------------------------------------|----------------------------------------|-------------------------|-----------------------------------------------|---------------------------------|-------|----------------------|---------|
| 3369-Seal_20percent_Condensed<br>29<br>-0.0049  | Uncategorized Sample<br>97<br>-3.1  | Bio Sample 1<br>Seal_20percent.5382.2<br>219      | Seal_20percent<br>ISNELGYCFAEK       | recombinant_protein_20130729<br>R<br>I | GAV-CpCWB<br>99.7%      | recombinant_protein_20130729<br>2.35<br>0.438 | 100.0%<br>Carbamidomethyl (+57) | 1.61% | 26,812.4<br>1,592.71 | 12<br>2 |
| 3369-Seal_20percent_Condensed<br>29<br>0.0013   | Uncategorized Sample<br>97<br>0.83  | Bio Sample 1<br>Seal_20percent.6289.6289.2<br>219 | Seal_20percent<br>ISNELGYCFAEK       | recombinant_protein_20130729<br>R<br>I | GAV-CpCWB<br>99.7%      | recombinant_protein_20130729<br>2.73<br>0.467 | 100.0%<br>Carbamidomethyl (+57) | 1.61% | 26,812.4<br>1,592.72 | 12<br>2 |
| 3369-Seal_20percent_Condensed<br>29<br>0.99     | Uncategorized Sample<br>97<br>620   | Bio Sample 1<br>Seal_20percent.5708.5708.2<br>219 | Seal_20percent<br>ISNELGYCFAEK       | recombinant_protein_20130729<br>R<br>I | GAV-CpCWB<br>99.7%      | recombinant_protein_20130729<br>4.05<br>0.392 | 100.0%<br>Carbamidomethyl (+57) | 1.61% | 26,812.4<br>1,593.71 | 12<br>2 |
| 3369-Seal_20percent_Condensed<br>29<br>0.0023   | Uncategorized Sample<br>97<br>1.4   | Bio Sample 1<br>Seal_20percent.6154.6154.2<br>219 | Seal_20percent<br>ISNELGYCFAEK       | recombinant_protein_20130729<br>R<br>I | GAV-CpCWB<br>99.7%      | recombinant_protein_20130729<br>3.06<br>0.451 | 100.0%<br>Carbamidomethyl (+57) | 1.61% | 26,812.4<br>1,592.72 | 12<br>2 |
| 3369-Seal_20percent_Condensed<br>29<br>0.0097   | Uncategorized Sample<br>97<br>6.1   | Bio Sample 1<br>Seal_20percent.5860.5860.2<br>219 | Seal_20percent<br>ISNELGYCFAEK       | recombinant_protein_20130729<br>R<br>I | GAV-CpCWB<br>99.7%      | recombinant_protein_20130729<br>3.99<br>0.443 | 100.0%<br>Carbamidomethyl (+57) | 1.61% | 26,812.4<br>1,592.73 | 12<br>2 |
| 3369-Seal_20percent_Condensed<br>29<br>-0.0037  | Uncategorized Sample<br>97<br>-2.3  | Bio Sample 1<br>Seal_20percent.5497.5497.2<br>219 | Seal_20percent<br>ISNELGYCFAEK       | recombinant_protein_20130729<br>R<br>I | GAV-CpCWB<br>99.7%      | recombinant_protein_20130729<br>4.39<br>0.424 | 100.0%<br>Carbamidomethyl (+57) | 1.61% | 26,812.4<br>1,592.71 | 12<br>2 |
| 3369-Seal_20percent_Condensed<br>29<br>-1.00    | Uncategorized Sample<br>97<br>-630  | Bio Sample 1<br>Seal_20percent.6191.6191.2<br>219 | Seal_20percent<br>ISNELGYCFAEK       | recombinant_protein_20130729<br>R<br>I | GAV-CpCWB<br>99.7%      | recombinant_protein_20130729<br>4.35<br>0.520 | 100.0%<br>Carbamidomethyl (+57) | 1.61% | 26,812.4<br>1,591.72 | 12<br>2 |
| 3369-Seal_20percent_Condensed<br>29<br>0.0022   | Uncategorized Sample<br>97<br>1.4   | Bio Sample 1<br>Seal_20percent.5993.5993.2<br>219 | Seal_20percent<br>ISNELGYCFAEK       | recombinant_protein_20130729<br>R<br>I | GAV-CpCWB<br>99.7%      | recombinant_protein_20130729<br>3.45<br>0.566 | 100.0%<br>Carbamidomethyl (+57) | 1.61% | 26,812.4<br>1,592.72 | 12<br>2 |
| 3369-Seal_20percent_Condensed<br>29<br>-0.0032  | Uncategorized Sample<br>97<br>-2.0  | Bio Sample 1<br>Seal_20percent.5647.5647.2<br>219 | Seal_20percent<br>ISNELGYCFAEK       | recombinant_protein_20130729<br>R<br>I | GAV-CpCWB<br>99.7%      | recombinant_protein_20130729<br>4.72<br>0.478 | 100.0%<br>Carbamidomethyl (+57) | 1.61% | 26,812.4<br>1,592.71 | 12<br>2 |
| 3369-Seal_20percent_Condensed<br>29<br>-0.0040  | Uncategorized Sample<br>97<br>-2.5  | Bio Sample 1<br>Seal_20percent.5573.5573.3<br>219 | Seal_20percent<br>ISNELGYCFAEK       | recombinant_protein_20130729<br>R<br>I | GAV-CpCWB<br>99.7%      | recombinant_protein_20130729<br>3.99<br>0.500 | 100.0%<br>Carbamidomethyl (+57) | 1.61% | 26,812.4<br>1,592.71 | 12<br>3 |
| 3369-Seal_20percent_Condensed<br>29<br>-0.0029  | Uncategorized Sample<br>97<br>-1.8  | Bio Sample 1<br>Seal_20percent.5433.5433.3<br>219 | Seal_20percent<br>ISNELGYCFAEK       | recombinant_protein_20130729<br>R<br>I | GAV-CpCWB<br>99.7%      | recombinant_protein_20130729<br>3.91<br>0.547 | 100.0%<br>Carbamidomethyl (+57) | 1.61% | 26,812.4<br>1,592.72 | 12<br>3 |
| 3369-Seal_20percent_Condensed<br>29<br>-0.017   | Uncategorized Sample<br>97<br>-7.6  | Bio Sample 1<br>Seal_20percent.7247.7247.2<br>31  | Seal_20percent<br>IVEYATDYLAHYEGFTQR | recombinant_protein_20130729<br>K      | GAV-CpCWB<br>V<br>99.7% | recombinant_protein_20130729<br>2.88<br>0.378 | 100.0%<br>0.378                 | 1.61% | 26,812.4<br>2,246.05 | 12<br>2 |
| 3369-Seal_20percent_Condensed<br>29<br>-0.0066  | Uncategorized Sample<br>97<br>-2.9  | Bio Sample 1<br>Seal_20percent.8282.8282.3<br>31  | Seal_20percent<br>IVEYATDYLAHYEGFTQR | recombinant_protein_20130729<br>K      | GAV-CpCWB<br>V<br>99.7% | recombinant_protein_20130729<br>1.95<br>0.444 | 100.0%<br>0.444                 | 1.61% | 26,812.4<br>2,246.06 | 12<br>3 |
| 3369-Seal_20percent_Condensed<br>29<br>-0.0024  | Uncategorized Sample<br>97<br>-1.1  | Bio Sample 1<br>Seal_20percent.5913.5913.2<br>31  | Seal_20percent<br>IVEYATDYLAHYEGFTQR | recombinant_protein_20130729<br>K      | GAV-CpCWB<br>V<br>99.7% | recombinant_protein_20130729<br>2.86<br>0.516 | 100.0%<br>0.516                 | 1.61% | 26,812.4<br>2,246.06 | 12<br>2 |
| 3369-Seal_20percent_Condensed<br>29<br>0.000079 | Uncategorized Sample<br>97<br>0.035 | Bio Sample 1<br>Seal_20percent.7126.7126.2<br>31  | Seal_20percent<br>IVEYATDYLAHYEGFTQR | recombinant_protein_20130729<br>K      | GAV-CpCWB<br>V<br>99.7% | recombinant_protein_20130729<br>2.55<br>0.556 | 100.0%<br>0.556                 | 1.61% | 26,812.4<br>2,246.06 | 12<br>2 |
| 3369-Seal_20percent_Condensed<br>29<br>-0.0066  | Uncategorized Sample<br>97<br>-2.9  | Bio Sample 1<br>Seal_20percent.6788.6788.3<br>31  | Seal_20percent<br>IVEYATDYLAHYEGFTQR | recombinant_protein_20130729<br>K      | GAV-CpCWB<br>V<br>99.7% | recombinant_protein_20130729<br>2.99<br>0.410 | 100.0%<br>0.410                 | 1.61% | 26,812.4<br>2,246.06 | 12<br>3 |
| 3369-Seal_20percent_Condensed<br>29<br>-0.0031  | Uncategorized Sample<br>97<br>-1.4  | Bio Sample 1<br>Seal_20percent.7312.7312.3<br>31  | Seal_20percent<br>IVEYATDYLAHYEGFTQR | recombinant_protein_20130729<br>K      | GAV-CpCWB<br>V<br>99.7% | recombinant_protein_20130729<br>2.28<br>0.479 | 100.0%<br>0.479                 | 1.61% | 26,812.4<br>2,246.06 | 12<br>3 |
| 3369-Seal_20percent_Condensed<br>29<br>-0.0046  | Uncategorized Sample<br>97<br>-2.0  | Bio Sample 1<br>Seal_20percent.7185.7185.3<br>31  | Seal_20percent<br>IVEYATDYLAHYEGFTQR | recombinant_protein_20130729<br>K      | GAV-CpCWB<br>V<br>99.7% | recombinant_protein_20130729<br>3.68<br>0.383 | 100.0%<br>0.383                 | 1.61% | 26,812.4<br>2,246.06 | 12<br>3 |
| 3369-Seal_20percent_Condensed<br>29<br>-0.0055  | Uncategorized Sample<br>97<br>-2.5  | Bio Sample 1<br>Seal_20percent.6794.6794.2<br>31  | Seal_20percent<br>IVEYATDYLAHYEGFTQR | recombinant_protein_20130729<br>K      | GAV-CpCWB<br>V<br>99.7% | recombinant_protein_20130729<br>3.26<br>0.523 | 100.0%<br>0.523                 | 1.61% | 26,812.4<br>2,246.06 | 12<br>2 |
| 3369-Seal_20percent_Condensed<br>29<br>-0.0055  | Uncategorized Sample<br>97<br>-2.4  | Bio Sample 1<br>Seal_20percent.8149.8149.3<br>31  | Seal_20percent<br>IVEYATDYLAHYEGFTQR | recombinant_protein_20130729<br>K      | GAV-CpCWB<br>V<br>99.7% | recombinant_protein_20130729<br>2.50<br>0.472 | 100.0%<br>0.472                 | 1.61% | 26,812.4<br>2,246.06 | 12<br>3 |
| 3369-Seal_20percent_Condensed<br>29<br>-0.0065  | Uncategorized Sample<br>97<br>-2.9  | Bio Sample 1<br>Seal_20percent.6294.6294.2<br>31  | Seal_20percent<br>IVEYATDYLAHYEGFTQR | recombinant_protein_20130729<br>K      | GAV-CpCWB<br>V<br>99.7% | recombinant_protein_20130729<br>3.07<br>0.598 | 100.0%<br>0.598                 | 1.61% | 26,812.4<br>2,246.06 | 12<br>2 |
| 3369-Seal_20percent_Condensed<br>29<br>-0.0057  | Uncategorized Sample<br>97<br>-2.5  | Bio Sample 1<br>Seal_20percent.6947.6947.4<br>31  | Seal_20percent<br>IVEYATDYLAHYEGFTQR | recombinant_protein_20130729<br>K      | GAV-CpCWB<br>V<br>99.7% | recombinant_protein_20130729<br>4.01<br>0.428 | 100.0%<br>0.428                 | 1.61% | 26,812.4<br>2,246.06 | 12<br>4 |
| 3369-Seal_20percent_Condensed<br>29<br>-0.0068  | Uncategorized Sample<br>97<br>-3.0  | Bio Sample 1<br>Seal_20percent.6997.6997.2<br>31  | Seal_20percent<br>IVEYATDYLAHYEGFTQR | recombinant_protein_20130729<br>K      | GAV-CpCWB<br>V<br>99.7% | recombinant_protein_20130729<br>4.00<br>0.585 | 100.0%<br>0.585                 | 1.61% | 26,812.4<br>2,246.06 | 12<br>2 |
| 3369-Seal_20percent_Condensed<br>29<br>-0.0027  | Uncategorized Sample<br>97<br>-1.2  | Bio Sample 1<br>Seal_20percent.7063.7063.3<br>31  | Seal_20percent<br>IVEYATDYLAHYEGFTQR | recombinant_protein_20130729<br>K      | GAV-CpCWB<br>V<br>99.7% | recombinant_protein_20130729<br>2.97<br>0.518 | 100.0%<br>0.518                 | 1.61% | 26,812.4<br>2,246.06 | 12<br>3 |
| 3369-Seal_20percent_Condensed<br>29<br>-0.0013  | Uncategorized Sample<br>97<br>-0.57 | Bio Sample 1<br>Seal_20percent.6802.6802.4<br>31  | Seal_20percent<br>IVEYATDYLAHYEGFTQR | recombinant_protein_20130729<br>K      | GAV-CpCWB<br>V<br>99.7% | recombinant_protein_20130729<br>4.25<br>0.480 | 100.0%<br>0.480                 | 1.61% | 26,812.4<br>2,246.06 | 12<br>4 |
| 3369-Seal_20percent_Condensed<br>29<br>-0.0024  | Uncategorized Sample<br>97<br>-1.1  | Bio Sample 1<br>Seal_20percent.6311.6311.3<br>31  | Seal_20percent<br>IVEYATDYLAHYEGFTQR | recombinant_protein_20130729<br>K      | GAV-CpCWB<br>V<br>99.7% | recombinant_protein_20130729<br>3.70<br>0.595 | 100.0%<br>0.595                 | 1.61% | 26,812.4<br>2,246.06 | 12<br>3 |

|                                                 |                                     |                                                          |                                            |                              |                |                                               |                 |                          |                      |         |
|-------------------------------------------------|-------------------------------------|----------------------------------------------------------|--------------------------------------------|------------------------------|----------------|-----------------------------------------------|-----------------|--------------------------|----------------------|---------|
| 3369-Seal_20percent_Condensed<br>29<br>-0.0024  | Uncategorized Sample<br>97<br>-1.1  | Bio Sample 1<br>Seal_20percent.6924.6924.3<br>49         | Seal_20percent<br>IVEVATDYLAHHYEGFTQR<br>K | recombinant_protein_20130729 | GAV-CpCWB<br>V | recombinant_protein_20130729<br>99.7%<br>3.78 | 100.0%<br>0.601 | 1.61%<br>Oxidation (+16) | 26,812.4<br>2,246.06 | 12<br>3 |
| 3369-Seal_20percent_Condensed<br>29<br>-0.0065  | Uncategorized Sample<br>97<br>-3.4  | Bio Sample 1<br>Seal_20percent.6351.6351.2<br>139<br>155 | Seal_20percent<br>MPAVLTENLFIDSNDAK<br>K   | recombinant_protein_20130729 | GAV-CpCWB<br>H | recombinant_protein_20130729<br>99.7%<br>1.88 | 100.0%<br>0.398 | 1.61%<br>Oxidation (+16) | 26,812.4<br>1,892.91 | 12<br>2 |
| 3369-Seal_20percent_Condensed<br>29<br>-0.0038  | Uncategorized Sample<br>97<br>-2.0  | Bio Sample 1<br>Seal_20percent.6636.6636.3<br>139<br>155 | Seal_20percent<br>MPAVLTENLFIDSNDAK<br>K   | recombinant_protein_20130729 | GAV-CpCWB<br>H | recombinant_protein_20130729<br>99.7%<br>3.99 | 100.0%<br>0.156 | 1.61%<br>Oxidation (+16) | 26,812.4<br>1,892.92 | 12<br>3 |
| 3369-Seal_20percent_Condensed<br>29<br>0.0021   | Uncategorized Sample<br>97<br>1.1   | Bio Sample 1<br>Seal_20percent.6189.6189.2<br>139<br>155 | Seal_20percent<br>MPAVLTENLFIDSNDAK<br>K   | recombinant_protein_20130729 | GAV-CpCWB<br>H | recombinant_protein_20130729<br>99.7%<br>2.32 | 100.0%<br>0.334 | 1.61%<br>Oxidation (+16) | 26,812.4<br>1,892.92 | 12<br>2 |
| 3369-Seal_20percent_Condensed<br>29<br>-0.0051  | Uncategorized Sample<br>97<br>-2.7  | Bio Sample 1<br>Seal_20percent.7332.7332.2<br>139<br>155 | Seal_20percent<br>MPAVLTENLFIDSNDAK<br>K   | recombinant_protein_20130729 | GAV-CpCWB<br>H | recombinant_protein_20130729<br>99.7%<br>2.87 | 100.0%<br>0.289 | 1.61%<br>Oxidation (+16) | 26,812.4<br>1,892.91 | 12<br>2 |
| 3369-Seal_20percent_Condensed<br>29<br>0.99     | Uncategorized Sample<br>97<br>530   | Bio Sample 1<br>Seal_20percent.7399.7399.2<br>139<br>155 | Seal_20percent<br>MPAVLTENLFIDSNDAK<br>K   | recombinant_protein_20130729 | GAV-CpCWB<br>H | recombinant_protein_20130729<br>99.7%<br>2.85 | 100.0%<br>0.396 | 1.61%<br>Oxidation (+16) | 26,812.4<br>1,877.91 | 12<br>2 |
| 3369-Seal_20percent_Condensed<br>29<br>-0.0076  | Uncategorized Sample<br>97<br>-4.0  | Bio Sample 1<br>Seal_20percent.7870.7870.3<br>139<br>155 | Seal_20percent<br>MPAVLTENLFIDSNDAK<br>K   | recombinant_protein_20130729 | GAV-CpCWB<br>H | recombinant_protein_20130729<br>99.7%<br>3.72 | 100.0%<br>0.235 | 1.61%<br>Oxidation (+16) | 26,812.4<br>1,876.92 | 12<br>3 |
| 3369-Seal_20percent_Condensed<br>29<br>-0.0063  | Uncategorized Sample<br>97<br>-3.3  | Bio Sample 1<br>Seal_20percent.7592.7592.3<br>139<br>155 | Seal_20percent<br>MPAVLTENLFIDSNDAK<br>K   | recombinant_protein_20130729 | GAV-CpCWB<br>H | recombinant_protein_20130729<br>99.7%<br>3.94 | 100.0%<br>0.228 | 1.61%<br>Oxidation (+16) | 26,812.4<br>1,876.92 | 12<br>3 |
| 3369-Seal_20percent_Condensed<br>29<br>-0.0030  | Uncategorized Sample<br>97<br>-1.6  | Bio Sample 1<br>Seal_20percent.8099.8099.2<br>139<br>155 | Seal_20percent<br>MPAVLTENLFIDSNDAK<br>K   | recombinant_protein_20130729 | GAV-CpCWB<br>H | recombinant_protein_20130729<br>99.7%<br>3.11 | 100.0%<br>0.345 | 1.61%<br>Oxidation (+16) | 26,812.4<br>1,876.92 | 12<br>2 |
| 3369-Seal_20percent_Condensed<br>29<br>-0.0032  | Uncategorized Sample<br>97<br>-1.7  | Bio Sample 1<br>Seal_20percent.7471.7471.2<br>139<br>155 | Seal_20percent<br>MPAVLTENLFIDSNDAK<br>K   | recombinant_protein_20130729 | GAV-CpCWB<br>H | recombinant_protein_20130729<br>99.7%<br>2.96 | 100.0%<br>0.398 | 1.61%<br>Oxidation (+16) | 26,812.4<br>1,892.92 | 12<br>2 |
| 3369-Seal_20percent_Condensed<br>29<br>-0.0033  | Uncategorized Sample<br>97<br>-1.7  | Bio Sample 1<br>Seal_20percent.6776.6776.3<br>139<br>155 | Seal_20percent<br>MPAVLTENLFIDSNDAK<br>K   | recombinant_protein_20130729 | GAV-CpCWB<br>H | recombinant_protein_20130729<br>99.7%<br>3.94 | 100.0%<br>0.267 | 1.61%<br>Oxidation (+16) | 26,812.4<br>1,892.92 | 12<br>3 |
| 3369-Seal_20percent_Condensed<br>29<br>-0.0017  | Uncategorized Sample<br>97<br>-0.90 | Bio Sample 1<br>Seal_20percent.7177.7177.2<br>139<br>155 | Seal_20percent<br>MPAVLTENLFIDSNDAK<br>K   | recombinant_protein_20130729 | GAV-CpCWB<br>H | recombinant_protein_20130729<br>99.7%<br>2.62 | 100.0%<br>0.472 | 1.61%<br>Oxidation (+16) | 26,812.4<br>1,876.92 | 12<br>2 |
| 3369-Seal_20percent_Condensed<br>29<br>-0.0032  | Uncategorized Sample<br>97<br>-1.7  | Bio Sample 1<br>Seal_20percent.8225.8225.2<br>139<br>155 | Seal_20percent<br>MPAVLTENLFIDSNDAK<br>K   | recombinant_protein_20130729 | GAV-CpCWB<br>H | recombinant_protein_20130729<br>99.7%<br>2.40 | 100.0%<br>0.505 | 1.61%<br>Oxidation (+16) | 26,812.4<br>1,876.92 | 12<br>2 |
| 3369-Seal_20percent_Condensed<br>29<br>-0.0021  | Uncategorized Sample<br>97<br>-1.1  | Bio Sample 1<br>Seal_20percent.7386.7386.2<br>139<br>155 | Seal_20percent<br>MPAVLTENLFIDSNDAK<br>K   | recombinant_protein_20130729 | GAV-CpCWB<br>H | recombinant_protein_20130729<br>99.7%<br>2.78 | 100.0%<br>0.517 | 1.61%<br>Oxidation (+16) | 26,812.4<br>1,876.92 | 12<br>2 |
| 3369-Seal_20percent_Condensed<br>29<br>-0.0019  | Uncategorized Sample<br>97<br>-0.98 | Bio Sample 1<br>Seal_20percent.6945.6945.2<br>139<br>155 | Seal_20percent<br>MPAVLTENLFIDSNDAK<br>K   | recombinant_protein_20130729 | GAV-CpCWB<br>H | recombinant_protein_20130729<br>99.7%<br>4.43 | 100.0%<br>0.429 | 1.61%<br>Oxidation (+16) | 26,812.4<br>1,892.92 | 12<br>2 |
| 3369-Seal_20percent_Condensed<br>29<br>-0.0065  | Uncategorized Sample<br>97<br>-3.4  | Bio Sample 1<br>Seal_20percent.6482.6482.2<br>139<br>155 | Seal_20percent<br>MPAVLTENLFIDSNDAK<br>K   | recombinant_protein_20130729 | GAV-CpCWB<br>H | recombinant_protein_20130729<br>99.7%<br>3.63 | 100.0%<br>0.502 | 1.61%<br>Oxidation (+16) | 26,812.4<br>1,892.91 | 12<br>2 |
| 3369-Seal_20percent_Condensed<br>29<br>0.000100 | Uncategorized Sample<br>97<br>0.053 | Bio Sample 1<br>Seal_20percent.7601.7601.2<br>139<br>155 | Seal_20percent<br>MPAVLTENLFIDSNDAK<br>K   | recombinant_protein_20130729 | GAV-CpCWB<br>H | recombinant_protein_20130729<br>99.7%<br>4.08 | 100.0%<br>0.498 | 1.61%<br>Oxidation (+16) | 26,812.4<br>1,892.92 | 12<br>2 |
| 3369-Seal_20percent_Condensed<br>29<br>-0.0017  | Uncategorized Sample<br>97<br>-0.90 | Bio Sample 1<br>Seal_20percent.7518.7518.2<br>139<br>155 | Seal_20percent<br>MPAVLTENLFIDSNDAK<br>K   | recombinant_protein_20130729 | GAV-CpCWB<br>H | recombinant_protein_20130729<br>99.7%<br>4.48 | 100.0%<br>0.480 | 1.61%<br>Oxidation (+16) | 26,812.4<br>1,876.92 | 12<br>2 |
| 3369-Seal_20percent_Condensed<br>29<br>-0.0055  | Uncategorized Sample<br>97<br>-3.0  | Bio Sample 1<br>Seal_20percent.7709.7709.3<br>139<br>155 | Seal_20percent<br>MPAVLTENLFIDSNDAK<br>K   | recombinant_protein_20130729 | GAV-CpCWB<br>H | recombinant_protein_20130729<br>99.7%<br>5.04 | 100.0%<br>0.365 | 1.61%<br>Oxidation (+16) | 26,812.4<br>1,876.92 | 12<br>3 |
| 3369-Seal_20percent_Condensed<br>29<br>0.99     | Uncategorized Sample<br>97<br>520   | Bio Sample 1<br>Seal_20percent.6874.6874.2<br>139<br>155 | Seal_20percent<br>MPAVLTENLFIDSNDAK<br>K   | recombinant_protein_20130729 | GAV-CpCWB<br>H | recombinant_protein_20130729<br>99.7%<br>4.72 | 100.0%<br>0.527 | 1.61%<br>Oxidation (+16) | 26,812.4<br>1,893.91 | 12<br>2 |
| 3369-Seal_20percent_Condensed<br>29<br>-0.0050  | Uncategorized Sample<br>97<br>-2.7  | Bio Sample 1<br>Seal_20percent.7728.7728.2<br>139<br>155 | Seal_20percent<br>MPAVLTENLFIDSNDAK<br>K   | recombinant_protein_20130729 | GAV-CpCWB<br>H | recombinant_protein_20130729<br>99.7%<br>3.76 | 100.0%<br>0.566 | 1.61%<br>Oxidation (+16) | 26,812.4<br>1,892.91 | 12<br>2 |
| 3369-Seal_20percent_Condensed<br>29<br>0.0051   | Uncategorized Sample<br>97<br>2.7   | Bio Sample 1<br>Seal_20percent.7076.7076.2<br>139<br>155 | Seal_20percent<br>MPAVLTENLFIDSNDAK<br>K   | recombinant_protein_20130729 | GAV-CpCWB<br>H | recombinant_protein_20130729<br>99.7%<br>4.10 | 100.0%<br>0.538 | 1.61%<br>Oxidation (+16) | 26,812.4<br>1,892.92 | 12<br>2 |
| 3369-Seal_20percent_Condensed<br>29<br>-0.0034  | Uncategorized Sample<br>97<br>-1.8  | Bio Sample 1<br>Seal_20percent.7200.7200.2<br>139<br>155 | Seal_20percent<br>MPAVLTENLFIDSNDAK<br>K   | recombinant_protein_20130729 | GAV-CpCWB<br>H | recombinant_protein_20130729<br>99.7%<br>4.05 | 100.0%<br>0.556 | 1.61%<br>Oxidation (+16) | 26,812.4<br>1,892.92 | 12<br>2 |
| 3369-Seal_20percent_Condensed<br>29<br>0.99     | Uncategorized Sample<br>97<br>530   | Bio Sample 1<br>Seal_20percent.7781.7781.2<br>139<br>155 | Seal_20percent<br>MPAVLTENLFIDSNDAK<br>K   | recombinant_protein_20130729 | GAV-CpCWB<br>H | recombinant_protein_20130729<br>99.7%<br>5.90 | 100.0%<br>0.500 | 1.61%<br>Oxidation (+16) | 26,812.4<br>1,877.91 | 12<br>2 |
| 3369-Seal_20percent_Condensed<br>29<br>-0.0043  | Uncategorized Sample<br>97<br>-2.3  | Bio Sample 1<br>Seal_20percent.7869.7869.2<br>139<br>155 | Seal_20percent<br>MPAVLTENLFIDSNDAK<br>K   | recombinant_protein_20130729 | GAV-CpCWB<br>H | recombinant_protein_20130729<br>99.7%<br>5.13 | 100.0%<br>0.519 | 1.61%<br>Oxidation (+16) | 26,812.4<br>1,876.92 | 12<br>2 |
| 3369-Seal_20percent_Condensed<br>29<br>-0.0020  | Uncategorized Sample<br>97<br>-1.0  | Bio Sample 1<br>Seal_20percent.6805.6805.2<br>139<br>155 | Seal_20percent<br>MPAVLTENLFIDSNDAK<br>K   | recombinant_protein_20130729 | GAV-CpCWB<br>H | recombinant_protein_20130729<br>99.7%<br>5.17 | 100.0%<br>0.549 | 1.61%<br>Oxidation (+16) | 26,812.4<br>1,892.92 | 12<br>2 |

|                                                |                                     |                                                          |                                            |                                        |                |                                               |                 |                          |                      |                |
|------------------------------------------------|-------------------------------------|----------------------------------------------------------|--------------------------------------------|----------------------------------------|----------------|-----------------------------------------------|-----------------|--------------------------|----------------------|----------------|
| 3369-Seal_20percent_Condensed<br>29<br>-0.0022 | Uncategorized Sample<br>97<br>-1.2  | Bio Sample 1<br>Seal_20percent.6619.6619.2<br>139<br>155 | Seal_20percent<br>MPAVLTENLFIDSNDAK        | recombinant_protein_20130729<br>K      | GAV-CpCWB<br>H | recombinant_protein_20130729<br>5.63          | 100.0%<br>0.527 | 1.61%<br>Oxidation (+16) | 26,812.4<br>1,892.92 | 12<br>2        |
| 3369-Seal_20percent_Condensed<br>29<br>-0.0013 | Uncategorized Sample<br>97<br>-0.70 | Bio Sample 1<br>Seal_20percent.7983.7983.2<br>139<br>155 | Seal_20percent<br>MPAVLTENLFIDSNDAK        | recombinant_protein_20130729<br>K      | GAV-CpCWB<br>H | recombinant_protein_20130729<br>4.65          | 100.0%<br>0.605 | 1.61%                    | 26,812.4<br>1,876.92 | 12<br>2        |
| 3369-Seal_20percent_Condensed<br>29<br>-0.0019 | Uncategorized Sample<br>97<br>-1.0  | Bio Sample 1<br>Seal_20percent.7658.7658.2<br>139<br>155 | Seal_20percent<br>MPAVLTENLFIDSNDAK        | recombinant_protein_20130729<br>K      | GAV-CpCWB<br>H | recombinant_protein_20130729<br>5.63          | 100.0%<br>0.600 | 1.61%                    | 26,812.4<br>1,876.92 | 12<br>2        |
| 3369-Seal_20percent_Condensed<br>29<br>-2.1    | Uncategorized Sample<br>97<br>159   | Bio Sample 1<br>Seal_20percent.3760.3760.3<br>172        | Seal_20percent<br>NEAFKAVGEAHAR            | recombinant_protein_20130729<br>K<br>G | GAV-CpCWB<br>H | recombinant_protein_20130729<br>1.96<br>0.364 | 100.0%<br>0.600 | 1.61%<br>1,511.78        | 26,812.4<br>3        | 12<br>-0.0032  |
| 3369-Seal_20percent_Condensed<br>29<br>-0.0049 | Uncategorized Sample<br>97<br>-1.7  | Bio Sample 1<br>Seal_20percent.9195.9195.4<br>26<br>49   | Seal_20percent<br>NLTHKIVEYATDYLAAHYEGFTQR | recombinant_protein_20130729<br>K      | GAV-CpCWB<br>V | recombinant_protein_20130729<br>3.06          | 100.0%<br>0.212 | 1.61%                    | 26,812.4<br>2,839.39 | 12<br>4        |
| 3369-Seal_20percent_Condensed<br>29<br>-0.018  | Uncategorized Sample<br>97<br>-6.4  | Bio Sample 1<br>Seal_20percent.9334.9334.4<br>26<br>49   | Seal_20percent<br>NLTHKIVEYATDYLAAHYEGFTQR | recombinant_protein_20130729<br>K      | GAV-CpCWB<br>V | recombinant_protein_20130729<br>4.03          | 100.0%<br>0.539 | 1.61%                    | 26,812.4<br>2,839.37 | 12<br>4        |
| 3369-Seal_20percent_Condensed<br>29<br>0.0045  | Uncategorized Sample<br>97<br>1.6   | Bio Sample 1<br>Seal_20percent.9247.9247.3<br>26<br>49   | Seal_20percent<br>NLTHKIVEYATDYLAAHYEGFTQR | recombinant_protein_20130729<br>K      | GAV-CpCWB<br>V | recombinant_protein_20130729<br>3.80          | 100.0%<br>0.564 | 1.61%                    | 26,812.4<br>2,839.40 | 12<br>3        |
| 3369-Seal_20percent_Condensed<br>29<br>0.36    | Uncategorized Sample<br>97<br>181   | Bio Sample 1<br>Seal_20percent.6645.6645.2<br>194        | Seal_20percent<br>YLANAIDPNIPLEK           | recombinant_protein_20130729<br>R<br>E | GAV-CpCWB<br>H | recombinant_protein_20130729<br>2.78<br>0.256 | 100.0%<br>0.256 | 1.61%<br>1,569.84        | 26,812.4<br>2        | 12<br>0.00057  |
| 3369-Seal_20percent_Condensed<br>29<br>-2.1    | Uncategorized Sample<br>97<br>181   | Bio Sample 1<br>Seal_20percent.5875.5875.3<br>194        | Seal_20percent<br>YLANAIDPNIPLEK           | recombinant_protein_20130729<br>R<br>E | GAV-CpCWB<br>H | recombinant_protein_20130729<br>3.78<br>0.224 | 100.0%<br>0.224 | 1.61%<br>1,569.84        | 26,812.4<br>3        | 12<br>-0.0034  |
| 3369-Seal_20percent_Condensed<br>29<br>-1.5    | Uncategorized Sample<br>97<br>181   | Bio Sample 1<br>Seal_20percent.6783.6783.2<br>194        | Seal_20percent<br>YLANAIDPNIPLEK           | recombinant_protein_20130729<br>R<br>E | GAV-CpCWB<br>H | recombinant_protein_20130729<br>2.73<br>0.376 | 100.0%<br>0.376 | 1.61%<br>1,569.84        | 26,812.4<br>2        | 12<br>-0.0024  |
| 3369-Seal_20percent_Condensed<br>29<br>-4.6    | Uncategorized Sample<br>97<br>181   | Bio Sample 1<br>Seal_20percent.6505.6505.2<br>194        | Seal_20percent<br>YLANAIDPNIPLEK           | recombinant_protein_20130729<br>R<br>E | GAV-CpCWB<br>H | recombinant_protein_20130729<br>3.05<br>0.357 | 100.0%<br>0.357 | 1.61%<br>1,569.83        | 26,812.4<br>2        | 12<br>-0.0072  |
| 3369-Seal_20percent_Condensed<br>29<br>-1.8    | Uncategorized Sample<br>97<br>181   | Bio Sample 1<br>Seal_20percent.6377.6377.2<br>194        | Seal_20percent<br>YLANAIDPNIPLEK           | recombinant_protein_20130729<br>R<br>E | GAV-CpCWB<br>H | recombinant_protein_20130729<br>3.35<br>0.334 | 100.0%<br>0.334 | 1.61%<br>1,569.84        | 26,812.4<br>2        | 12<br>-0.0029  |
| 3369-Seal_20percent_Condensed<br>29<br>-0.57   | Uncategorized Sample<br>97<br>181   | Bio Sample 1<br>Seal_20percent.6099.6099.2<br>194        | Seal_20percent<br>YLANAIDPNIPLEK           | recombinant_protein_20130729<br>R<br>E | GAV-CpCWB<br>H | recombinant_protein_20130729<br>3.74<br>0.333 | 100.0%<br>0.333 | 1.61%<br>1,569.84        | 26,812.4<br>2        | 12<br>-0.00090 |
| 3369-Seal_20percent_Condensed<br>29<br>-1.6    | Uncategorized Sample<br>97<br>181   | Bio Sample 1<br>Seal_20percent.6236.6236.2<br>194        | Seal_20percent<br>YLANAIDPNIPLEK           | recombinant_protein_20130729<br>R<br>E | GAV-CpCWB<br>H | recombinant_protein_20130729<br>3.63<br>0.372 | 100.0%<br>0.372 | 1.61%<br>1,569.84        | 26,812.4<br>2        | 12<br>-0.0025  |
| 3369-Seal_20percent_Condensed<br>29<br>-2.6    | Uncategorized Sample<br>97<br>181   | Bio Sample 1<br>Seal_20percent.5759.5759.3<br>194        | Seal_20percent<br>YLANAIDPNIPLEK           | recombinant_protein_20130729<br>R<br>E | GAV-CpCWB<br>H | recombinant_protein_20130729<br>3.83<br>0.318 | 100.0%<br>0.318 | 1.61%<br>1,569.84        | 26,812.4<br>3        | 12<br>-0.0041  |
| 3369-Seal_20percent_Condensed<br>29<br>-1.6    | Uncategorized Sample<br>97<br>181   | Bio Sample 1<br>Seal_20percent.5756.5756.2<br>194        | Seal_20percent<br>YLANAIDPNIPLEK           | recombinant_protein_20130729<br>R<br>E | GAV-CpCWB<br>H | recombinant_protein_20130729<br>4.24<br>0.385 | 100.0%<br>0.385 | 1.61%<br>1,569.84        | 26,812.4<br>2        | 12<br>-0.0025  |
| 3369-Seal_20percent_Condensed<br>29<br>-1.7    | Uncategorized Sample<br>97<br>181   | Bio Sample 1<br>Seal_20percent.5872.5872.2<br>194        | Seal_20percent<br>YLANAIDPNIPLEK           | recombinant_protein_20130729<br>R<br>E | GAV-CpCWB<br>H | recombinant_protein_20130729<br>4.28<br>0.415 | 100.0%<br>0.415 | 1.61%<br>1,569.84        | 26,812.4<br>2        | 12<br>-0.0027  |
| 3369-Seal_20percent_Condensed<br>29<br>-0.0032 | Uncategorized Sample<br>97<br>-1.3  | Bio Sample 1<br>Seal_20percent.6225.6225.3<br>181<br>200 | Seal_20percent<br>YLANAIDPNIPLEKEQDYVR     | recombinant_protein_20130729<br>R      | GAV-CpCWB<br>V | recombinant_protein_20130729<br>3.12          | 100.0%<br>0.257 | 1.61%                    | 26,812.4<br>2,424.19 | 12<br>3        |
| 3369-Seal_20percent_Condensed<br>29<br>-0.0083 | Uncategorized Sample<br>97<br>-3.4  | Bio Sample 1<br>Seal_20percent.6230.6230.2<br>181<br>200 | Seal_20percent<br>YLANAIDPNIPLEKEQDYVR     | recombinant_protein_20130729<br>R      | GAV-CpCWB<br>V | recombinant_protein_20130729<br>2.58          | 100.0%<br>0.440 | 1.61%                    | 26,812.4<br>2,424.19 | 12<br>2        |
| 3369-Seal_20percent_Condensed<br>29<br>-0.0025 | Uncategorized Sample<br>97<br>-1.0  | Bio Sample 1<br>Seal_20percent.6085.6085.3<br>181<br>200 | Seal_20percent<br>YLANAIDPNIPLEKEQDYVR     | recombinant_protein_20130729<br>R      | GAV-CpCWB<br>V | recombinant_protein_20130729<br>3.39          | 100.0%<br>0.384 | 1.61%                    | 26,812.4<br>2,424.19 | 12<br>3        |
